# Supplementary material for: Correlation between circulating tumor DNA quantity assessed by methylated markers and tumor volume in patients with metastatic pancreatic adenocarcinoma.
Source: Research Square preprint supplement (doi:10.21203/rs.3.rs-6422905/v1), 2025-05-25
Supplement: Supplementary file 1 [file 8591b95fef26270967babe64.docx]

Supplementary figure 1:


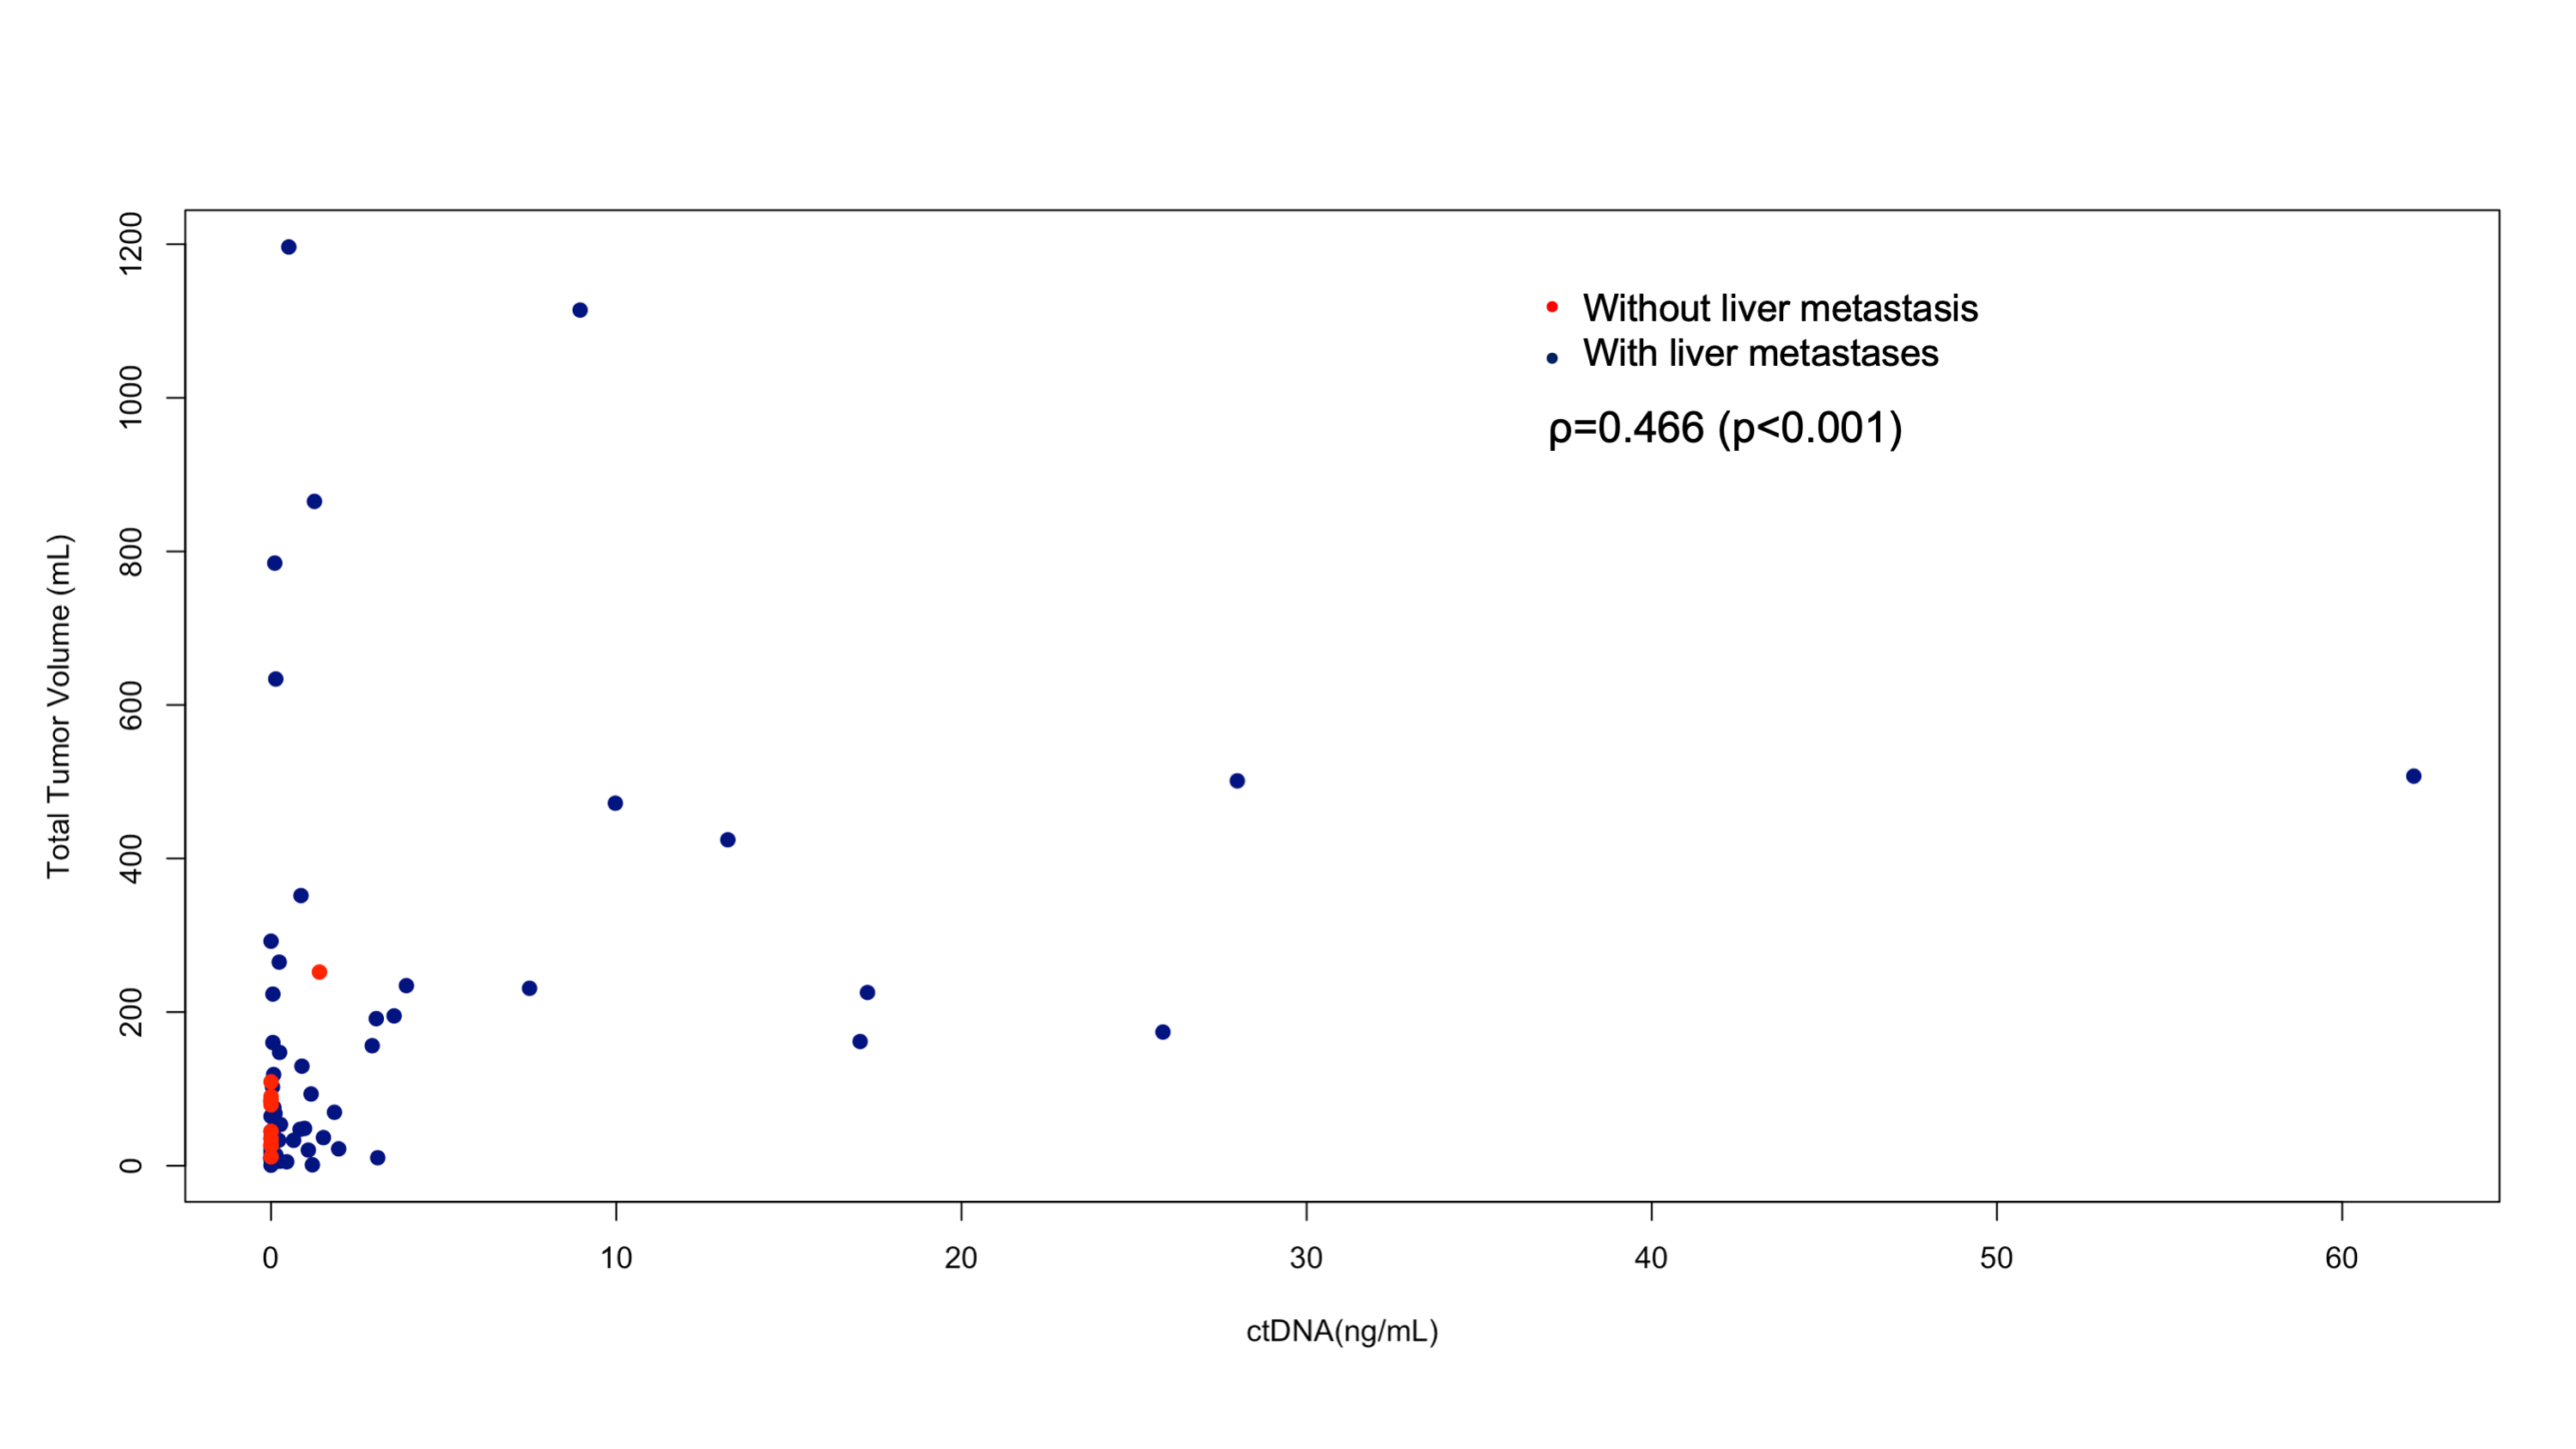


Supplementary figure 2:

| Patients’ characteristics | Overall population | Negative ctDNA | Positive ctDNA |
| --- | --- | --- | --- |
| n | 11 | 10 | 1 |
| Total tumor volume (median [IQ]) | 44.8 [27.5, 88.1] | 40.1 [27.1, 84.4] | 252.2 |
| Primary lesion tumor volume (mL) (median [IQR]) | 19.4 [9.4, 69.9] | 18.0 [9.1, 73.0] | 31.1 |
| Number of liver lesions (median [IQ]) | 0 | 0 | 0 |
| Liver tumor volume (mL) (median [IQ]) | 0 | 0 | 0 |
| Number of lymph node lesions (median [IQ]) | 1.0 [0.0, 5.5] | 0.5 [0.0, 1.8] | 19 |
| Lymph node tumor volume (mL) (median [IQ]) | 8.9 [0.0, 15.3] | 1.3 [0.0, 11.8] | 221.1 |
| Number of peritoneal lesions (median [IQ]) | 5 [0.0, 11.0]] | 6.0 [0.0, 12.0]] | 0 |
| Peritoneal tumor volume (mL) (median [IQ]) | 8.9 [0.0, 15.3] | 9.9 [0.0, 15.3] | 0 |
| Number of pulmonary lesions (median [IQ]) | 0.0 [0.0, 3.5] | 0.0 [0.0, 4.8] | 0 |
| Pulmonary tumor volume (mL) (median [IQ]) | 0.0 [0.0, 1.6] | 0.0 [0.0, 2.2] | 0 |

Supplementary table 1: characteristic of patients without liver metastasis

Supplementary table 2: characteristic of patients with lymph node, liver our pulmonary metastasis

| Patients’ characteristics | Overall population | Negative ctDNA | Positive ctDNA | p |
| --- | --- | --- | --- | --- |
| Patient with lymph node metastases (n) | 27 | 10 | 17 |
| Number of liver lesions (median [IQ]) | 7.0 [1.5, 40.0] | 0.5 [0.0, 5.0] | 22.0 [7.0, 52.0] | 0.003 |
| Liver tumor volume (mL) (median [IQ]) | 11.1 [0.7, 98.1] | 0.4 [0.0, 1.8] | 43.2 [11.1, 171.4] | 0.002 |
| Patient with peritoneal metastases (n) | 16 | 8 | 8 |  |
| Number of liver lesions (median [IQ]) | 5.5 [0.0, 11.5] | 0.0 [0.0, 1.3] | 12.0 [9.0, 21.5] | 0.002 |
| Liver tumor volume (mL) (median [IQ]) | 8.6 [0.0, 15.2] | 0.0 [0.0, 1.5] | 16.0 [13.1, 110.8] | 0.001 |
| Patient with pulmonary metastases (n) | 14 | 6 | 8 |  |
| Number of liver lesions (median [IQ]) | 7.0 [0.3, 17.5] | 0.0 [0.0, 0.8] | 17.0 [11.5, 48.8] | 0.002 |
| Liver tumor volume (mL) (median [IQ]) | 12.8 [0.1, 109.7] | 0.0 [0.0, 0.3] | 100.9 [25.1, 151.3] | 0.002 |

Supplementary File: detailed method

**Methylation marker development and validation**

HOXD8 and POU4F1 methylation markers were selected from The Cancer Genome Atlas (TCGA) (http://cancergenome.nih.gov/). The selected region contained CpGs that were significantly differentially methylated between tumour and healthy pancreas tissues. The CpGs containing region was selected from a list of 485,577 CpGs annotated with genes, including their methylation level in healthy and tumour tissue, the difference in methylation level between healthy and tumour tissue (the fold change), correlated with the tumour and normal cells count in cancer patients. Analysis of DNA methylation of HOXD8 and POU4F1 in tumour and non-tumour tissue (matched adjacent non-tumour tissue) from pancreatic cancer patients was validated by ddPCR (n = 19 tumour tissues and n = 17 matched adjacent non-tumour tissue). Samples were selected with at least one detectable mutation in KRAS, TP53 or SMAD4 (mutated allelic frequency from 2.9 to 71.3 %) when sequenced by NGS using colon lung panel v2 (Thermo Fisher). One adjacent non-tumour tissue appeared mutated in TP53 (4.3 %, 83.1 % for the matched tumour tissue) and was thus excluded from further analyses. Compared to non-tumour tissue, DNA methylation in tumour tissue was significantly increased (p = 0.0005 for POU4F1 and p = 0.0001 for HOXD8, Wilcoxon paired test, n = 17). The sensitivity was 79 %, and the specificity of 100 % when considering both markers simultaneously. When analyzing plasma ccfDNA from healthy individuals (n = 12) by ddPCR for the presence of the two methylated markers, none were detected as positive for both markers and one sample presented low positivity with one maker (HOXD8, three positive droplets [lower than LOD] corresponding to 0.4 % of methylated DNA).

**Plasma sample preparation, storage, DNA extraction and quantification**

9 mL of blood samples were collected in EDTA tubes. The collected samples were centrifuged at 3,500 rpm for 15 min at 4°C within 3 hours of blood draw. Plasma was stored at -80°C until further use.

Before extraction, plasma samples were centrifuged for15 min at 5000 rpm.

Initially (from 2011 to June 2015) DNA was extracted from plasma with QIAamp® Circulating Nucleic Acid kit (Qiagen, Cat No. 55114) according to the manufacturer’s instructions with an elution volume of 50µL. Incubation with proteinase K was performed for 30 min at 68°C. Extracted DNA from 2mL of plasma was eluted with 50μL buffer AVE and stored at -80°C.

From June 2015, DNA was extracted, according to the manufacturer’s instructions, from 1mL of plasma using the circulating cell-free DNA (ccfDNA) Plasma kit by RSC Maxwell® automated extraction (Promega, Cat No. AS4500). Extracted DNA from plasma was eluted with 60μL buffer AVE and stored at -80°C.

DNA concentration was assessed, from 2µL of eluted DNA, by Qubit 2.0 fluorometer (Invitrogen, Life Technologies) using the Qubit™ dsDNA HS (High Sensitivity) Assay kit (ThermoFisher Scientific).

Extracted DNA samples were stored frozen at -80°C before testing. Storage times were at maximum 1 month.

**Assessment of circulating tumor DNA**

All plasma samples were screened for the presence of methylation in the selected genes (HOXD8 and POU4F1) by droplet-based digital PCR (Met-ddPCR) using the QX-200 platform (BIO-RAD Technologies). This assay allowed for the simultaneous detection of HOXD8 and POU4F1 gene hypermethylation and uses an albumin un-methylated sequence as a reference for measuring amplifiable DNA within each sample. Bisulfite conversion was performed on 20 µL of eluted DNA. In brief, bisulfite reaction was carried out in a thermocycler at 98 °C for 12 min and 64 °C for 2h35 min. The cleanup of bisulfite-converted DNA followed the recommendations of the manufacturer (EZ DNA Methylation-Gold, ref. cat. D5006, Zymo Research) and converted DNA was eluted in 10 µl of M-Elution Buffer and stored at -20 °C. Ten microliters of this bisulfite-converted DNA was used for PCR reaction. Twenty-two µL of PCR reagent mix was prepared following manufacturer’s recommendations in a pre-PCR environment. BIO-RAD ddPCR Super Mix for probes 20x (no dUTP) was used (cat. Ref. 1863024). Final concentrations in reaction mix of forward and reverse primers were 600nM and 400nM for albumin and methylated sequences respectively (primers ordered from Eurofins). 200nM of VIC Taqman® labeled-probes was used to detect albumin unmethylated sequences, 200nM of FAM Taqman® labeled-probes was used to detect POU4F1 methylated sequences and 100nM of both FAM and VIC Taqman® labeled-probes were used to detect HOXD8 methylated sequences (see eMethod 1 for primer and probe sequences, probes ordered from Thermofisher). For each performed serie (8 to 48 samples), two different controls were included: a positive control (universal methylated human DNA standard, Zymo research, cat. ref. D-5011-1) and a negative control (human genomic DNA, Promega, cat. Ref. G304A). The PCR step for ddPCR was performed on a BIO-RAD C1000 or S1000 using the following program: 10 min at 95°C (using a 2.5°C/second ramp rate), followed by 45 cycles of: 94°C, 30 s and 58.6°C, 1 min (using a 2.5°C/second ramp rate), with an ultimate step of 10 min at 98°C. After completion, the emulsions were either stored at 4°C or processed immediately to measure the end-point fluorescence signal from each droplet. Data was collected using the QuantaSoft™ BIO-RAD software (version 1.7.4.0917) as described by the manufacturer. Populations were clustered according to fluorescence levels, allowing to precisely count both tumor and normal amplifiable DNA molecules. Data were analyzed using the QuantaSoft™ Analysis Pro 1.0 BIO-RAD software.

A limit of blank (LOB) has been calculated. It is defined by the frequency of positive droplets measured in normal control DNA samples with no hypermethylated DNA present (n = 31, Human genomic DNA, Promega). The LOB was determined for each assay as a finite number of false mutant droplet events detected per analysis. Specifically, the LOBs were 5 (first integer superior number to calculated LOB) for HOXD8 (λFP =1.83)and 2 for POU4F1 (λFP =0.06) (eMethod 2). The calculated LOB were used for data analysis. Positivity of samples with number of droplets closed to LOB or positive for only one marker was verified by BPER NGS (see below). For all samples with number of droplets below LOB, the concentration of ctDNA in plasma was considered zero.

**ctDNA and ccfDNA quantity calcul**

To calculate ctDNA quantity (ng/mL), we used the methylated biomarker for which the number of droplets was the highest and applied the following formula:

3.3 = weight of an haploid genome (picograms)

Corrective factor = 2,5 or 3 (according to the 50μL or 60μL of elution volume/20μL of elution volume used for bisulfite conversion)

To calculate ccfDNA, the same formula was used with the number of droplets of the albumin un-methylated sequence, used as reference for measuring amplifiable DNA.
